# Supplementary material for: The Shock of COVID-19 Pandemic on the Moroccan Exchange Rate Dirham/Euro
Source: Frontiers journal article supplement (doi:10.3389/fams.2022.941845), 2022-07-08
Supplement: Table_1.XLSX [file Table_1.XLSX]

## Sheet: Sheet1
DATE
2021-06-04
2021-06-07
2021-06-08
2021-06-09
2021-06-10
2021-06-14
2021-06-15
2021-06-16
2021-06-17
2021-06-18
2021-06-21
2021-06-22
2021-06-23
2021-06-24
2021-06-25
2021-06-28
2021-06-29
2021-07-01
2021-07-05
2021-07-06
2021-07-07
2021-07-08
2021-07-12
2021-07-13
2021-07-14
2021-07-16
2021-07-19
2021-07-20
2021-07-27
2021-07-28
2021-07-29
2021-08-02
2021-08-03
2021-08-05
2021-08-11
2021-08-12
2021-08-16
2021-08-18
2021-08-23
2021-08-24
2021-08-25
2021-08-30
2021-08-31
2021-09-01
2021-09-06
2021-09-07
2021-09-09
2021-09-13
2021-09-14
2021-09-15
2021-09-16
2021-09-21
2021-09-22
2021-09-27
2021-09-28
2021-10-04
2021-10-05
2021-10-06
2021-10-07
2021-10-13
2021-10-15
2021-10-18
2021-10-21
2021-10-22
2021-10-25
2021-10-26
2021-10-27
2021-11-01
2021-11-02
2021-11-03
2021-11-08
2021-11-09
2021-11-10
2021-11-15
2021-11-16
2021-11-23
2021-11-24
2021-11-29
2021-12-01
2021-12-02
2021-12-03
2021-12-06
2021-12-07
2021-12-08
2021-12-09
2021-12-10
2021-12-13
2021-12-14
2021-12-15
2021-12-16
2021-12-17
2021-12-20
2021-12-21
2021-12-23
2021-12-24
2021-12-27
2021-12-28
2021-12-29
2021-12-30
2021-12-31
2022-01-03
2022-01-04
2022-01-05
2022-01-06
2022-01-07
2022-01-10
2022-01-12
2022-01-13
2022-01-14
2022-01-17
2022-01-18
2022-01-19
2022-01-20
2022-01-21
2022-01-24
2022-01-25
2022-01-26
2022-01-27
2022-01-28
2022-01-31
2022-02-01
2022-02-02
2022-02-03
2022-02-04
2022-02-07
2022-02-08
2022-02-09
2022-02-10
2022-02-14
2022-02-15
2022-02-16
2022-02-17
2022-02-18
2022-02-21
2022-02-22
2022-02-23
2022-02-24
2022-02-25
2022-02-28
2022-03-01
2022-03-02
2022-03-03
2022-03-04
2022-03-07
2022-03-08
2022-03-09
2022-03-10
2022-03-11
2022-03-15
2022-03-16
2022-03-17
2022-03-18
2022-03-21
2022-03-22
2022-03-23
