# Supplementary material for: The Shock of COVID-19 Pandemic on the Moroccan Exchange Rate Dirham/Euro
Source: Frontiers journal article supplement (doi:10.3389/fams.2022.941845), 2022-07-08
Supplement: Table_2.XLSX [file Table_2.XLSX]

## Sheet: Sheet1
DATE	DMADEUR
1	8.29467e-05
2	8.29467e-05
3	-0.000108485
4	0.000108485
5	0
6	-0.000432468
7	0.000215744
8	0.000108239
9	-0.000108239
10	0.000216724
11	-0.000108485
12	-0.0022514
13	0.000292301
14	0.000268651
15	0.000223915
16	0.000535438
17	-0.000428235
18	2.36763e-05
19	-0.000158727
20	0.000118343
21	0.000148091
22	-3.42231e-05
23	-1.36268e-06
24	0.000225702
25	-2.88541e-05
26	-0.000932878
27	-6.09396e-05
28	-0.00016346
29	0.000569357
30	-0.000809813
31	-0.000453444
32	-0.00032938
33	0.00129784
34	-0.00204707
35	-0.00271249
36	-0.00197739
37	0.000296183
38	0.00372373
39	-0.00367315
40	-0.00227982
41	0.00222011
42	-0.00121278
43	0.00542897
44	-0.00436677
45	0.00518105
46	-0.00349402
47	-0.000772432
48	0.00443735
49	-0.00195918
50	-0.000933373
51	0.00325393
52	-0.00123205
53	0.000111062
54	0.0021806
55	-0.00155963
56	9.59142e-05
57	0.000293705
58	0.000624249
59	0.000306207
60	0.00108891
61	-0.000736372
62	0.00132005
63	6.29493e-05
64	0.000123965
65	-3.38452e-05
66	-0.000311729
67	0.000188747
68	-7.12673e-06
69	-0.000201017
70	-0.00015429
71	7.54102e-05
72	8.31364e-06
73	7.60278e-05
74	-7.37561e-06
75	0.00016664
76	-0.000181348
77	0.000221454
78	4.93249e-05
79	0.000266714
80	0.000363657
81	0.000206513
82	0.000203079
83	5.39185e-05
84	-0.000667476
85	-1.63291e-05
86	0.000218236
87	-0.000167471
88	0.000458888
89	-7.98414e-05
90	0.000192575
91	0.00248459
92	-0.00341033
93	0.000400289
94	1.06963e-05
95	-7.09504e-05
96	-0.000256699
97	0.000110335
98	-4.50165e-05
99	-0.00033488
100	-6.88856e-05
101	-0.000359893
102	5.43871e-05
103	-0.000662688
104	-0.000265332
105	-0.000196074
106	-0.000475401
107	0.0013943
108	-0.00279868
109	-0.00123054
110	-0.000419673
111	-0.000612279
112	0.00330418
113	-0.00270382
114	-0.00226646
115	-9.47689e-05
116	0.00425198
117	-0.0034948
118	-0.00125191
119	0.000265985
120	0.000518046
121	0.00452176
122	-0.00302644
123	-0.000404391
124	0.00144284
125	0.000228634
126	0.00259253
127	-0.00157602
128	0.000100951
129	-0.000232609
130	0.000206317
131	0.00137991
132	-0.000805913
133	0.000196951
134	0.000120851
135	0.00100751
136	-0.000496
137	4.9802e-06
138	-0.000210561
139	-1.7231e-05
140	0.000356547
141	0.000102687
142	0.000189608
143	0.000464958
144	-0.00088685
145	-1.74383e-07
146	0.000693738
147	-0.000232195
148	-0.000186502
149	0.000316755
150	-0.000915906
151	-0.00101178
152	-0.000357733
153	0.000783617
154	0.000657641
155	0.000106569
