# Supplementary material for: The Shock of COVID-19 Pandemic on the Moroccan Exchange Rate Dirham/Euro
Source: Frontiers journal article supplement (doi:10.3389/fams.2022.941845), 2022-07-08
Supplement: Table_3.XLSX [file Table_3.XLSX]

## Sheet: Sheet1
DATE	NEWCASES
1	346
2	104
3	473
4	386
5	376
6	109
7	476
8	500
9	468
10	481
11	86
12	437
13	522
14	484
15	551
16	219
17	690
18	789
19	247
20	1177
21	1279
22	1336
23	657
24	1897
25	2257
26	2791
27	1153
28	3631
29	6971
30	9428
31	8995
32	4206
33	8760
34	12039
35	9153
36	10828
37	3897
38	9703
39	2996
40	7184
41	8008
42	2676
43	4899
44	6020
45	1923
46	3524
47	3451
48	917
49	2785
50	2642
51	2432
52	1848
53	1702
54	394
55	1192
56	228
57	676
58	727
59	668
60	581
61	437
62	148
63	255
64	430
65	101
66	425
67	398
68	138
69	260
70	223
71	55
72	159
73	151
74	45
75	120
76	157
77	130
78	53
79	171
80	135
81	151
82	52
83	158
84	145
85	146
86	175
87	62
88	219
89	221
90	205
91	209
92	102
93	381
94	475
95	654
96	291
97	1184
98	1504
99	1960
100	2034
101	885
102	4299
103	5618
104	6050
105	6428
106	2622
107	5518
108	8338
109	8501
110	3177
111	7756
112	9355
113	9061
114	8338
115	2750
116	6362
117	7002
118	5560
119	4899
120	1321
121	3080
122	3051
123	2861
124	2266
125	721
126	1618
127	1499
128	1333
129	369
130	822
131	645
132	636
133	508
134	190
135	427
136	357
137	362
138	259
139	83
140	156
141	159
142	102
143	114
144	52
145	78
146	72
147	77
148	55
149	111
150	52
151	34
152	52
153	52
154	78
155	72
